# Supplementary material for: Enhancing Erythropoiesis by a Phytoestrogen Diarylheptanoid from Curcuma comosa
Source: MDPI journal article supplement (doi:10.3390/biomedicines10061427), 2022-06-16
Supplement: s1 [file s1]

## Supplementary materials

### Enhancing erythropoiesis by a phytoestrogen diarylheptanoid from *Curcuma comosa*

Kanit Bhukhai<sup>1,\*</sup>, Guillemette Fouquet<sup>2,3</sup>, Yutthana Rittavee<sup>4</sup>, Nopmullee Tanhuad<sup>1</sup>, Chaiyaporn Lakmuang<sup>5</sup>, Suparerk Borwornpinyo<sup>6,7</sup>, Usanarat Anurathapan<sup>8</sup>, Apichart Suksamrarn<sup>9</sup>, Pawinee Piyachaturawat<sup>1</sup>, Arthit Chairoungdua<sup>1,7</sup>, Olivier Hermine<sup>2,3,10,11</sup>, and Suradej Hongeng<sup>8,\*</sup>

<sup>1</sup>Department of Physiology, Faculty of Science, Mahidol University, Bangkok, Thailand

<sup>2</sup>Institut Hospitalo-Universitaire Imagine, Université Sorbonne Paris Cité, Assistance Publique-Hôpitaux de Paris, Hôpital Necker, Paris, France

<sup>3</sup>INSERM U1163 and CNRS ERL8254, Université Paris Descartes, Faculté de Médecine, Hôpital Necker, Paris, France

<sup>4</sup>Department of Biology, Faculty of Science, Mahidol University, Bangkok, Thailand

<sup>5</sup>Department of Chemistry, Faculty of Science, Mahidol University, Bangkok, Thailand

<sup>6</sup>Department of Biotechnology, Faculty of Science, Mahidol University, Bangkok, Thailand

<sup>7</sup>Excellent Center for Drug Discovery, Mahidol University, Bangkok, Thailand

<sup>8</sup>Department of Pediatrics, Faculty of Medicine, Ramathibodi Hospital, Mahidol University, Bangkok, Thailand

<sup>9</sup>Department of Chemistry and Center of Excellence for Innovation in Chemistry, Faculty of Science, Ram-khamhaeng University, Bangkok, Thailand

<sup>10</sup>Laboratory of Excellence GReX, Paris, France

<sup>11</sup>Service d'Hématologie Clinique Adultes, Assistance Publique-Hôpitaux de Paris, Hôpital Necker, Paris, France

\*Correspondence: Kanit Bhukhai, email: kanit.bhu@mahidol.ac.th, Tel.: +6622015614

Suradej Hongeng, email: suradej.hon@mahidol.ac.th, Tel.: +6622011495

**A**

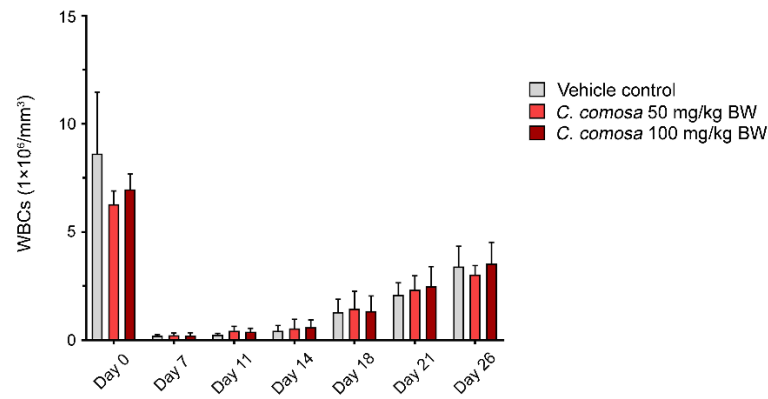

**B**

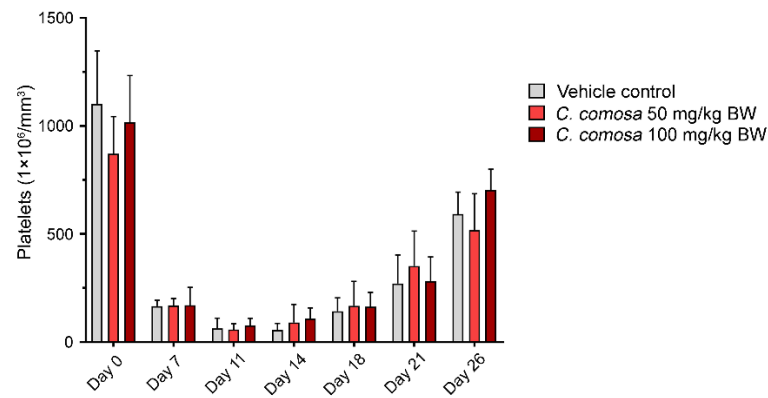

**Figure S1. Effects of *Curcuma comosa* extract on WBCs and platelets in anemic mice.** Hematologic response of mice to sublethal irradiation induced-anemia: (A) WBC and (B) platelet counts at days 7, 11, 14, 18, 21, and 26. Irradiated mice were intraperitoneally injected with vehicle or *C. comosa* extract (50 or 100 mg/kg BW) each day. Blood was collected from the retro-orbital plexus, and hematological parameters were monitored with an MS9 analyzer. All data are expressed as mean  $\pm$  standard error (n = 10). \*\*P < 0.01, ASPP 049 compared with vehicle control treatment (ANOVA); #P < 0.05 and ##P < 0.01, E2 compared with vehicle control treatment (ANOVA). WBC, white blood cell.

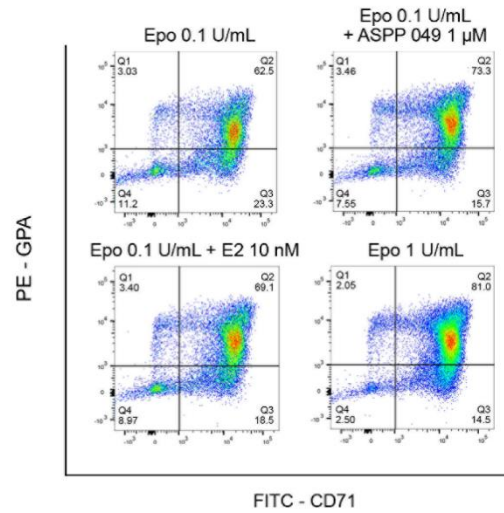

**Figure S2. Representative flow cytometry showing effects of ASPP 049 and E2 on immature erythrocyte marker expression.** CD34<sup>+</sup> HSCs plated in human erythroid culture medium were treated with 1  $\mu$ M ASPP 049 and 10 nM E2 in the presence of 0.1 U/mL of Epo for 14 days; 1 U/mL Epo was used as a positive control. Expression of GPA and CD71 was observed by flow cytometry analysis.

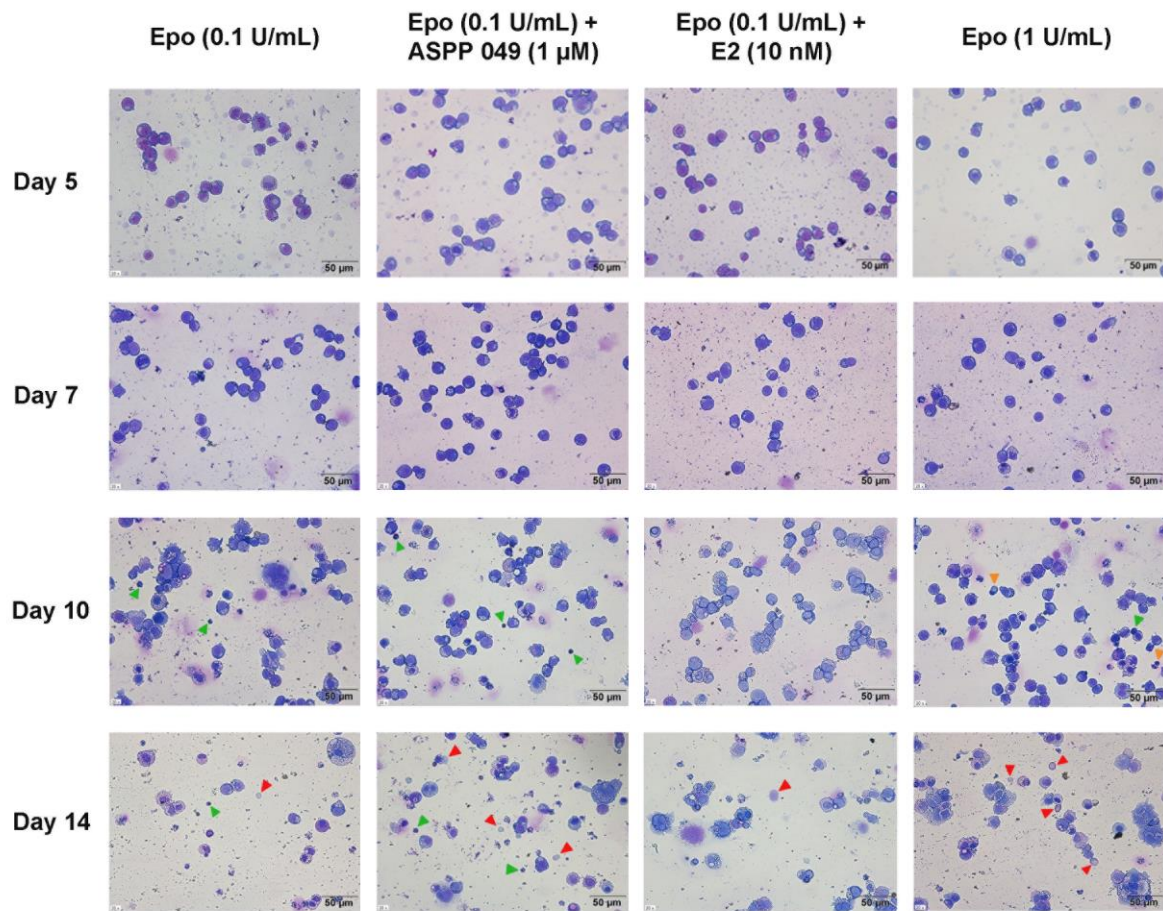

**Figure S3. Morphology of erythropoietic response in ASPP 049-treated HSC-derived erythroblasts.** CD34<sup>+</sup> HSCs plated in human erythroid culture medium were treated with 1  $\mu$ M ASPP 049 and 10 nM E2 in the presence of 0.1 U/mL of Epo for the indicated times; 1 U/mL Epo was used as a positive control. Morphological characteristics of erythropoietic cells were observed under a microscope using cytopsin with Liu staining. E2, 17 $\beta$ -estradiol; Epo, erythropoietin; HSCs, hematopoietic stem cells; green arrowhead, nucleus; orange arrowhead, enucleation; red arrowhead, RBCs.

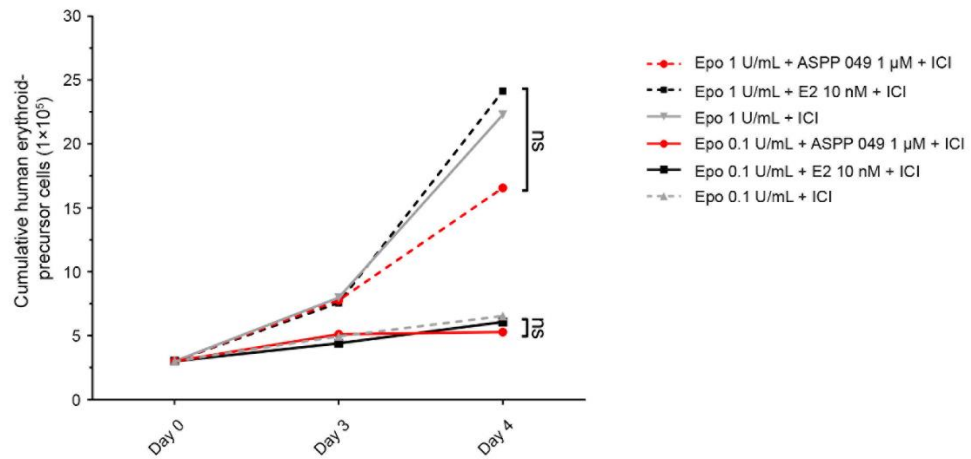

**Figure S4. Co-treatment of an ER antagonist with ASPP 049 or E2 failed to enhance erythroid precursor cell proliferation.** CD36<sup>+</sup> cells sorted from CD34<sup>+</sup> HSCs cultured in erythroid medium were treated with 1  $\mu$ M ASPP 049 and 10 nM E2 in the presence of 0.1 or 1 U/mL of Epo with or without an ER antagonist, ICI 182, 780. Proliferation of CD36<sup>+</sup> cells was observed by trypan blue exclusion assay. All data are expressed as mean  $\pm$  standard error (n = 3). ns, non-significant.

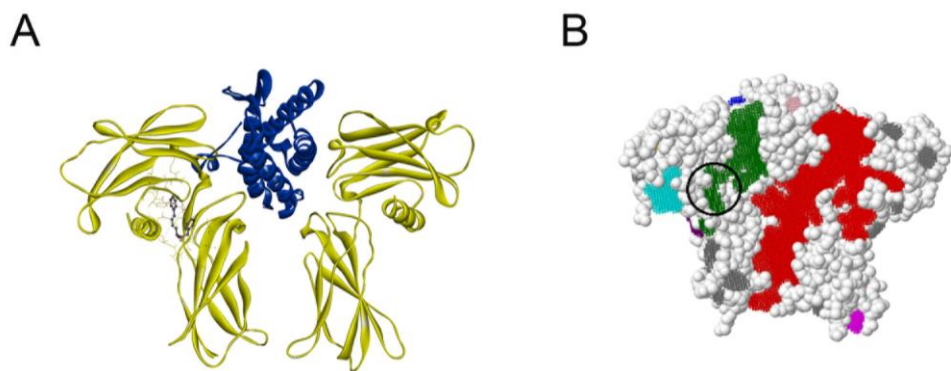

**Figure S5. ASPP 049 binds to the Epo-EpoR complex.** (A) Lowest energy position of ASPP 049 within the Epo-EpoR complex (crystal structure represented in gold). (B) Possible locations for binding site of ASPP 049. Epo, erythropoietin; EpoR, erythropoietin receptor.
